# Supplementary material for: Blending of Low-Density Polyethylene and Poly(Butylene Succinate) (LDPE/PBS) with Polyethylene–Graft–Maleic Anhydride (PE–g–MA) as a Compatibilizer on the Phase Morphology, Mechanical and Thermal Properties
Source: MDPI journal article supplement (doi:10.3390/polym15020261), 2023-01-04
Supplement: s1 [file s1]

# SUPPLEMENTARY MATERIAL

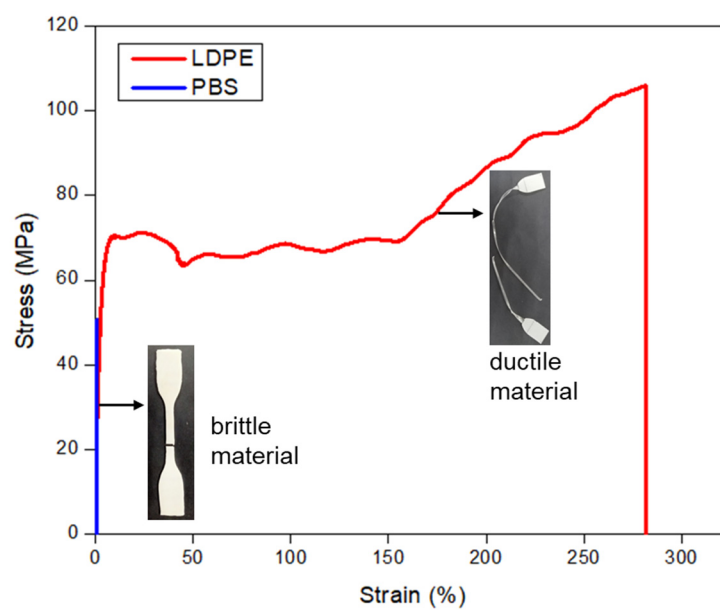

**Figure S1.** Behavior of ductile and brittle material

**Table S1:** Material deformation on mechanical analysis

| Material | Before mechanical analysis                                                          | After mechanical analysis                                                             |
|----------|-------------------------------------------------------------------------------------|---------------------------------------------------------------------------------------|
| LDPE     |  |  |
| PBS      |  |  |

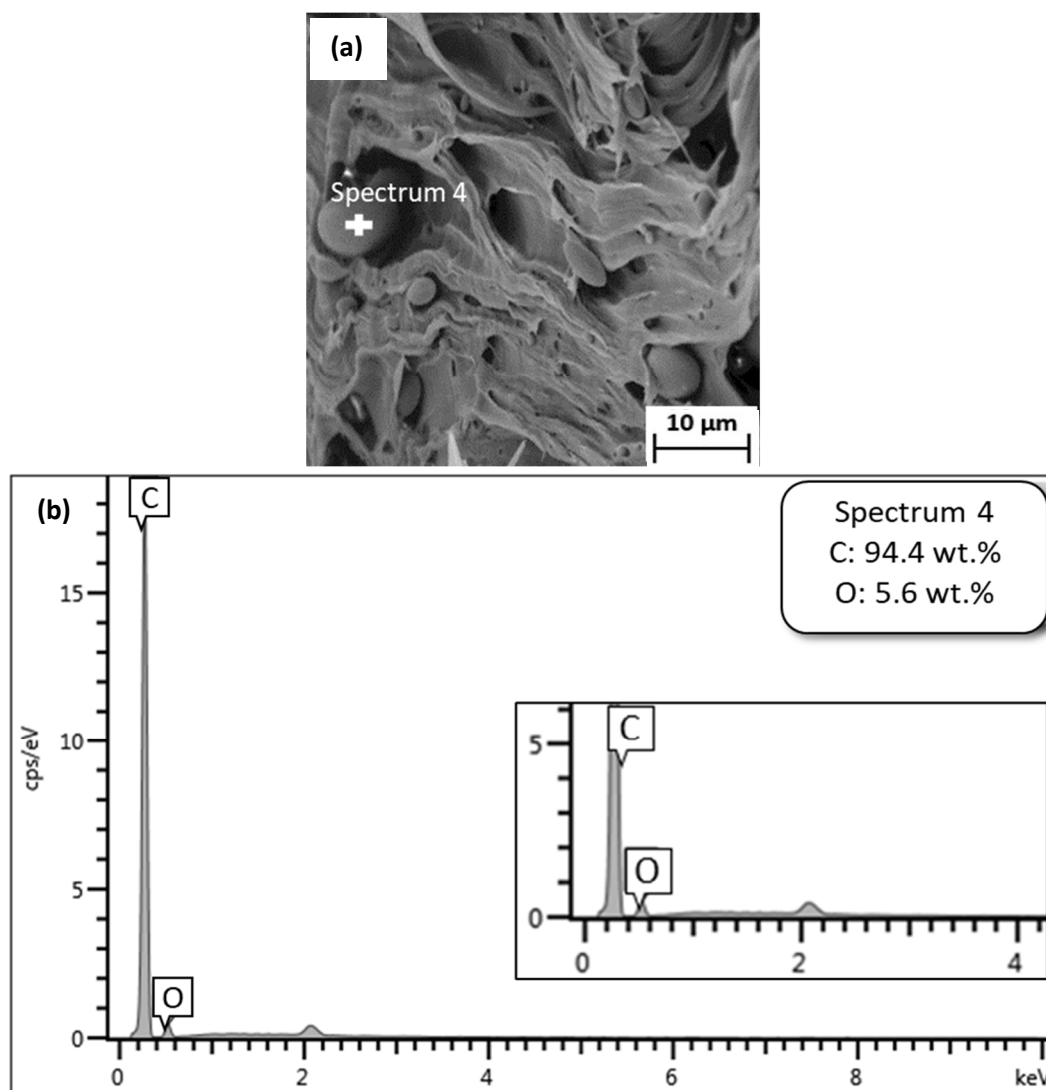

**Figure S2:** (a) Scanning electron microscopy with (b) energy-dispersive X-ray (SEM-EDX) analysis of 80LDPE/20PBS blend at 1000× magnification

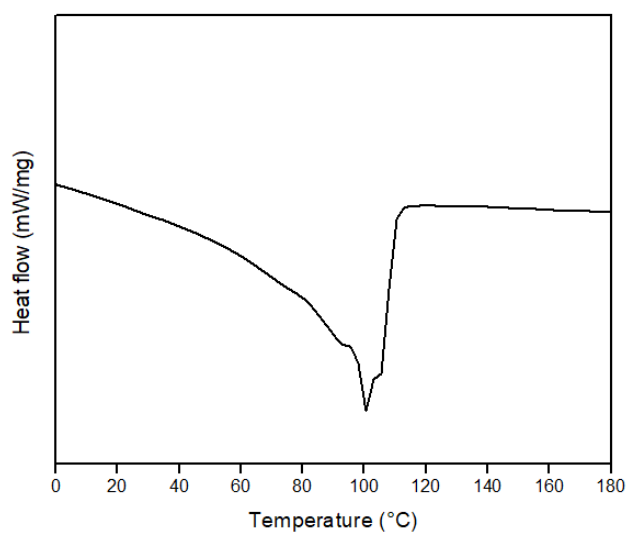

**Figure S3:** DSC thermogram: First heating scan of PE-g-MA

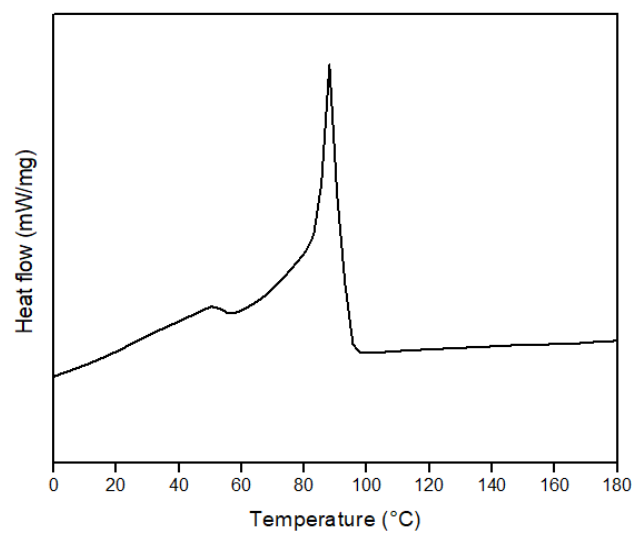

**Figure S4:** DSC thermogram: Cooling scan of PE-g-MA
